# Supplementary material
Source: PubMed Central journal article supplement (PMC8171008)
Supplement: TBSD_A_1931451_SM9874.pdf [file TBSD_A_1931451_SM9874.pdf]

**Chemical system biology approach to identify multi-targeting FDA inhibitors for treating COVID-19 and associated health complications**

**<sup>1</sup>Biswajit Naik, <sup>2</sup>M. Venkata Satish Kumar, <sup>1</sup>Nidhi Gupta, <sup>1</sup>Rupal Ojha <sup>2</sup>Pundarikaksha Das, <sup>1</sup>Satyendra Singh, <sup>1</sup>Vijay Kumar Prajapati, <sup>1</sup>Dhaneswar Prusty\***

1-Department of Biochemistry, School of Life Sciences, Central University of Rajasthan, NH-8, Bandarsindri, Kishangarh, Ajmer, Rajasthan-305817, India

2-Department of Molecular Biology and Biotechnology, Tezpur Central University, Napaam, Sonitpur District, Assam-784 028, India.

**Running Title- Multi-targeting FDA inhibitors for COVID-19**

**\*Corresponding author address**

**Dr. Dhaneswar Prusty**

Department of Biochemistry,

School of Life Sciences,

Central University of Rajasthan,

NH-8, Bandarsindri, Kishangarh,

305817, Ajmer, Rajasthan, India

Email- [dhaneswarprusty@curaj.ac.in](mailto:dhaneswarprusty@curaj.ac.in)

**Supplementary Table-1 Active site retrieved from published literatures**

| SL. No | Proteins                                                         | Accession No.                  | PDB ID               | ACTIVE SITE                                                                                                | References |
|--------|------------------------------------------------------------------|--------------------------------|----------------------|------------------------------------------------------------------------------------------------------------|------------|
| 1      | <b>3C-like proteinase</b>                                        | YP_009725301.1                 | 6LU7 bounded with N3 | C145, S46, Y54                                                                                             | [1]        |
| 2      | <b>RNA-dependent RNA polymerase</b>                              | YP_009725307.1                 | 6M71                 | Arg553, Arg555, Lys621, Asp623 and Ser814                                                                  | [2, 3]     |
| 3      | <b>helicase</b>                                                  | YP_009725308.1                 | Not available        | K288, S289, D374, E375, Q404, and R567                                                                     | [4, 5]     |
| 4      | <b>3'-to-5' exonuclease</b>                                      | YP_009725309.1                 | Not available        | Asp90, Glu92, Glu191 HIs268, Asp 273 for SARS                                                              | [6]        |
| 5      | <b>endoRNase</b>                                                 | YP_009725310.1                 | 6VWW                 | His235, His250, Lys290, Thr341, Tyr343, and Ser294                                                         | [7, 8]     |
| 6      | <b>2'-O-ribose methyltransferase</b>                             | YP_009725311.1                 | 6W61                 | Lys46, Asp130, Lys170, and Glu203                                                                          | [9]        |
| 7      | <b>Spike glycoprotein</b>                                        | <a href="#">YP_009724390.1</a> | 6VXX                 | TYR 449, THR 500, GLN 493, GLN 498, TYR 501, GLY 502 and TYR 505 for COVID-19                              | [10]       |
| 8      | <b>Spike glycoprotein / HUMAN_ACE2 hetero-oligomeric complex</b> | <a href="#">YP_009724390.1</a> | 6LZG                 | A475, N487, E484 and Y453 of spike glycoprotein interacting with hACE2 S19, Q24, K31, and H34 respectively | [11]       |
| 9      | <b>Papain-like proteinase (PL-PRO)</b>                           | <a href="#">YP_009725299.1</a> | 6W9C                 | Cys112, His272 and Asp286                                                                                  | [12]       |
| 10     | <b>Nucleocapsid</b>                                              | <a href="#">YP_009724393.1</a> | 6M3M                 | T55, A56, N48, N49, T50, A51 and R89                                                                       | [13]       |

**Supplementary Table-2 List of protein-ligand interaction between RNA dependent RNA polymerase and Rutin hydrate**

| PDB code: <b>6M71</b> Ligand: <b>Rutin hydrate (RUT)</b> |       |      |      |     |       |                         |       |      |     |       |          |
|----------------------------------------------------------|-------|------|------|-----|-------|-------------------------|-------|------|-----|-------|----------|
| Hydrogen bonds                                           |       |      |      |     |       |                         |       |      |     |       |          |
| -----                                                    |       |      |      |     |       |                         |       |      |     |       |          |
| <----- A T O M 1 ----->                                  |       |      |      |     |       | <----- A T O M 2 -----> |       |      |     |       |          |
| -----                                                    |       |      |      |     |       |                         |       |      |     |       |          |
|                                                          | Atom  | Atom | Res  | Res |       | Atom                    | Atom  | Res  | Res |       |          |
|                                                          | no.   | name | name | no. | Chain | no.                     | name  | name | no. | Chain | Distance |
| 1.                                                       | 8314  | OG   | SER  | 549 | A     | <--                     | 18049 | O6   | RUT | 900   | 3.12     |
| 2.                                                       | 8373  | NE   | ARG  | 553 | A     | -->                     | 18037 | O3   | RUT | 900   | 3.29     |
| 3.                                                       | 8375  | NH1  | ARG  | 553 | A     | -->                     | 18062 | O13  | RUT | 900   | 2.97     |
| 4.                                                       | 8376  | NH2  | ARG  | 553 | A     | -->                     | 18062 | O13  | RUT | 900   | 2.74     |
| 5.                                                       | 8424  | N    | THR  | 556 | A     | -->                     | 18069 | O16  | RUT | 900   | 2.96     |
| 6.                                                       | 8427  | O    | THR  | 556 | A     | <--                     | 18064 | O14  | RUT | 900   | 3.08     |
| 7.                                                       | 8427  | O    | THR  | 556 | A     | <--                     | 18067 | O15  | RUT | 900   | 2.76     |
| 8.                                                       | 9396  | N    | TYR  | 619 | A     | -->                     | 18053 | O8   | RUT | 900   | 3.10     |
| 9.                                                       | 9399  | O    | TYR  | 619 | A     | <--                     | 18052 | O7   | RUT | 900   | 3.35     |
| 10.                                                      | 9453  | N    | CYS  | 622 | A     | -->                     | 18057 | O10  | RUT | 900   | 2.82     |
| 11.                                                      | 9470  | OD1  | ASP  | 623 | A     | <--                     | 18057 | O10  | RUT | 900   | 2.86     |
| 12.                                                      | 10373 | OG   | SER  | 682 | A     | -->                     | 18067 | O15  | RUT | 900   | 2.94     |
| 13.                                                      | 11607 | O    | ASP  | 760 | A     | <--                     | 18053 | O8   | RUT | 900   | 2.86     |
| 14.                                                      | 11610 | OD1  | ASP  | 760 | A     | <--                     | 18053 | O8   | RUT | 900   | 3.27     |
| -----                                                    |       |      |      |     |       |                         |       |      |     |       |          |
| Non-bonded contacts                                      |       |      |      |     |       |                         |       |      |     |       |          |
| <----- A T O M 1 ----->                                  |       |      |      |     |       | <----- A T O M 2 -----> |       |      |     |       |          |
| -----                                                    |       |      |      |     |       |                         |       |      |     |       |          |
|                                                          | Atom  | Atom | Res  | Res |       | Atom                    | Atom  | Res  | Res |       |          |
|                                                          | no.   | name | name | no. | Chain | no.                     | name  | name | no. | Chain | Distance |
| 1.                                                       | 8314  | OG   | SER  | 549 | A     | ---                     | 18049 | O6   | RUT | 900   | 3.12     |
| 2.                                                       | 8337  | CE   | LYS  | 551 | A     | ---                     | 18049 | O6   | RUT | 900   | 3.71     |
| 3.                                                       | 8338  | NZ   | LYS  | 551 | A     | ---                     | 18042 | C13  | RUT | 900   | 3.56     |
| 4.                                                       | 8338  | NZ   | LYS  | 551 | A     | ---                     | 18049 | O6   | RUT | 900   | 3.33     |
| 5.                                                       | 8373  | NE   | ARG  | 553 | A     | ---                     | 18037 | O3   | RUT | 900   | 3.29     |
| 6.                                                       | 8374  | CZ   | ARG  | 553 | A     | ---                     | 18037 | O3   | RUT | 900   | 3.89     |
| 7.                                                       | 8374  | CZ   | ARG  | 553 | A     | ---                     | 18062 | O13  | RUT | 900   | 3.28     |
| 8.                                                       | 8374  | CZ   | ARG  | 553 | A     | ---                     | 18068 | C27  | RUT | 900   | 3.81     |
| 9.                                                       | 8375  | NH1  | ARG  | 553 | A     | ---                     | 18062 | O13  | RUT | 900   | 2.97     |
| 10.                                                      | 8375  | NH1  | ARG  | 553 | A     | ---                     | 18065 | C25  | RUT | 900   | 3.46     |
| 11.                                                      | 8375  | NH1  | ARG  | 553 | A     | ---                     | 18068 | C27  | RUT | 900   | 2.85     |
| 12.                                                      | 8376  | NH2  | ARG  | 553 | A     | ---                     | 18037 | O3   | RUT | 900   | 3.63     |
| 13.                                                      | 8376  | NH2  | ARG  | 553 | A     | ---                     | 18043 | O4   | RUT | 900   | 3.72     |
| 14.                                                      | 8376  | NH2  | ARG  | 553 | A     | ---                     | 18055 | C20  | RUT | 900   | 3.72     |
| 15.                                                      | 8376  | NH2  | ARG  | 553 | A     | ---                     | 18058 | O11  | RUT | 900   | 3.87     |
| 16.                                                      | 8376  | NH2  | ARG  | 553 | A     | ---                     | 18060 | C22  | RUT | 900   | 3.29     |
| 17.                                                      | 8376  | NH2  | ARG  | 553 | A     | ---                     | 18062 | O13  | RUT | 900   | 2.74     |
| 18.                                                      | 8424  | N    | THR  | 556 | A     | ---                     | 18069 | O16  | RUT | 900   | 2.96     |
| 19.                                                      | 8425  | CA   | THR  | 556 | A     | ---                     | 18069 | O16  | RUT | 900   | 3.54     |
| 20.                                                      | 8426  | C    | THR  | 556 | A     | ---                     | 18067 | O15  | RUT | 900   | 3.87     |
| 21.                                                      | 8426  | C    | THR  | 556 | A     | ---                     | 18069 | O16  | RUT | 900   | 3.64     |
| 22.                                                      | 8427  | O    | THR  | 556 | A     | ---                     | 18061 | C23  | RUT | 900   | 3.83     |
| 23.                                                      | 8427  | O    | THR  | 556 | A     | ---                     | 18063 | C24  | RUT | 900   | 3.54     |
| 24.                                                      | 8427  | O    | THR  | 556 | A     | ---                     | 18064 | O14  | RUT | 900   | 3.08     |
| 25.                                                      | 8427  | O    | THR  | 556 | A     | ---                     | 18066 | C26  | RUT | 900   | 3.76     |
| 26.                                                      | 8427  | O    | THR  | 556 | A     | ---                     | 18067 | O15  | RUT | 900   | 2.76     |

|                                |       |     |     |     |   |     |       |     |     |     |      |
|--------------------------------|-------|-----|-----|-----|---|-----|-------|-----|-----|-----|------|
| 27.                            | 8427  | O   | THR | 556 | A | --- | 18069 | O16 | RUT | 900 | 3.02 |
| 28.                            | 8428  | CB  | THR | 556 | A | --- | 18069 | O16 | RUT | 900 | 3.75 |
| 29.                            | 8429  | OG1 | THR | 556 | A | --- | 18066 | C26 | RUT | 900 | 3.84 |
| 30.                            | 8429  | OG1 | THR | 556 | A | --- | 18069 | O16 | RUT | 900 | 2.84 |
| 31.                            | 9385  | CA  | ASP | 618 | A | --- | 18053 | O8  | RUT | 900 | 3.84 |
| 32.                            | 9388  | CB  | ASP | 618 | A | --- | 18040 | C11 | RUT | 900 | 3.74 |
| 33.                            | 9396  | N   | TYR | 619 | A | --- | 18040 | C11 | RUT | 900 | 3.73 |
| 34.                            | 9396  | N   | TYR | 619 | A | --- | 18045 | C15 | RUT | 900 | 3.88 |
| 35.                            | 9396  | N   | TYR | 619 | A | --- | 18053 | O8  | RUT | 900 | 3.10 |
| 36.                            | 9399  | O   | TYR | 619 | A | --- | 18040 | C11 | RUT | 900 | 3.65 |
| 37.                            | 9399  | O   | TYR | 619 | A | --- | 18052 | O7  | RUT | 900 | 3.35 |
| 38.                            | 9400  | CB  | TYR | 619 | A | --- | 18053 | O8  | RUT | 900 | 3.89 |
| 39.                            | 9431  | N   | LYS | 621 | A | --- | 18052 | O7  | RUT | 900 | 3.48 |
| 40.                            | 9431  | N   | LYS | 621 | A | --- | 18057 | O10 | RUT | 900 | 3.60 |
| 41.                            | 9432  | CA  | LYS | 621 | A | --- | 18057 | O10 | RUT | 900 | 3.30 |
| 42.                            | 9433  | C   | LYS | 621 | A | --- | 18057 | O10 | RUT | 900 | 3.28 |
| 43.                            | 9453  | N   | CYS | 622 | A | --- | 18051 | C19 | RUT | 900 | 3.87 |
| 44.                            | 9453  | N   | CYS | 622 | A | --- | 18057 | O10 | RUT | 900 | 2.82 |
| 45.                            | 9454  | CA  | CYS | 622 | A | --- | 18057 | O10 | RUT | 900 | 3.75 |
| 46.                            | 9457  | CB  | CYS | 622 | A | --- | 18057 | O10 | RUT | 900 | 3.87 |
| 47.                            | 9464  | N   | ASP | 623 | A | --- | 18057 | O10 | RUT | 900 | 3.60 |
| 48.                            | 9469  | CG  | ASP | 623 | A | --- | 18056 | C21 | RUT | 900 | 3.66 |
| 49.                            | 9469  | CG  | ASP | 623 | A | --- | 18057 | O10 | RUT | 900 | 3.75 |
| 50.                            | 9469  | CG  | ASP | 623 | A | --- | 18059 | O12 | RUT | 900 | 3.47 |
| 51.                            | 9470  | OD1 | ASP | 623 | A | --- | 18051 | C19 | RUT | 900 | 3.73 |
| 52.                            | 9470  | OD1 | ASP | 623 | A | --- | 18056 | C21 | RUT | 900 | 3.42 |
| 53.                            | 9470  | OD1 | ASP | 623 | A | --- | 18057 | O10 | RUT | 900 | 2.86 |
| 54.                            | 9470  | OD1 | ASP | 623 | A | --- | 18059 | O12 | RUT | 900 | 3.10 |
| 55.                            | 9471  | OD2 | ASP | 623 | A | --- | 18056 | C21 | RUT | 900 | 3.83 |
| 56.                            | 9471  | OD2 | ASP | 623 | A | --- | 18058 | O11 | RUT | 900 | 3.76 |
| 57.                            | 9471  | OD2 | ASP | 623 | A | --- | 18059 | O12 | RUT | 900 | 3.42 |
| 58.                            | 9471  | OD2 | ASP | 623 | A | --- | 18063 | C24 | RUT | 900 | 3.31 |
| 59.                            | 9471  | OD2 | ASP | 623 | A | --- | 18065 | C25 | RUT | 900 | 3.11 |
| 60.                            | 9471  | OD2 | ASP | 623 | A | --- | 18066 | C26 | RUT | 900 | 3.19 |
| 61.                            | 9471  | OD2 | ASP | 623 | A | --- | 18068 | C27 | RUT | 900 | 3.84 |
| 62.                            | 9485  | NH1 | ARG | 624 | A | --- | 18066 | C26 | RUT | 900 | 3.77 |
| 63.                            | 9485  | NH1 | ARG | 624 | A | --- | 18068 | C27 | RUT | 900 | 3.75 |
| 64.                            | 10372 | CB  | SER | 682 | A | --- | 18067 | O15 | RUT | 900 | 3.12 |
| 65.                            | 10373 | OG  | SER | 682 | A | --- | 18067 | O15 | RUT | 900 | 2.94 |
| 66.                            | 11607 | O   | ASP | 760 | A | --- | 18046 | O5  | RUT | 900 | 3.48 |
| 67.                            | 11607 | O   | ASP | 760 | A | --- | 18053 | O8  | RUT | 900 | 2.86 |
| 68.                            | 11609 | CG  | ASP | 760 | A | --- | 18046 | O5  | RUT | 900 | 3.52 |
| 69.                            | 11609 | CG  | ASP | 760 | A | --- | 18053 | O8  | RUT | 900 | 3.76 |
| 70.                            | 11610 | OD1 | ASP | 760 | A | --- | 18039 | C10 | RUT | 900 | 3.79 |
| 71.                            | 11610 | OD1 | ASP | 760 | A | --- | 18045 | C15 | RUT | 900 | 3.65 |
| 72.                            | 11610 | OD1 | ASP | 760 | A | --- | 18046 | O5  | RUT | 900 | 3.55 |
| 73.                            | 11610 | OD1 | ASP | 760 | A | --- | 18053 | O8  | RUT | 900 | 3.27 |
| 74.                            | 11611 | OD2 | ASP | 760 | A | --- | 18046 | O5  | RUT | 900 | 3.23 |
| Number of hydrogen bonds:      |       |     |     |     |   |     |       |     |     | 14  |      |
| Number of non-bonded contacts: |       |     |     |     |   |     |       |     |     | 74  |      |

**Supplementary Table-3 List of protein-ligand interaction between exonuclease and Silymarin**

| PDB code: No PDB ( <b>Exonuclease</b> ) Ligand: <b>Silymarin (SYL)</b> |      |      |     |       |   |                         |      |      |     |       |          |
|------------------------------------------------------------------------|------|------|-----|-------|---|-------------------------|------|------|-----|-------|----------|
| Hydrogen bonds                                                         |      |      |     |       |   |                         |      |      |     |       |          |
| -----                                                                  |      |      |     |       |   |                         |      |      |     |       |          |
| <----- A T O M 1 ----->                                                |      |      |     |       |   | <----- A T O M 2 -----> |      |      |     |       |          |
| -----                                                                  |      |      |     |       |   |                         |      |      |     |       |          |
| Atom                                                                   | Atom | Res  | Res | Chain |   | Atom                    | Atom | Res  | Res | Chain | Distance |
| no.                                                                    | name | name | no. |       |   | no.                     | name | name | no. |       |          |
| 1.                                                                     | 1417 | O    | VAL | 91    | A | <--                     | 8275 | O7   | SYL | 900   | 2.78     |
| 2.                                                                     | 2984 | OE2  | GLU | 191   | A | <--                     | 8275 | O7   | SYL | 900   | 3.01     |
| 3.                                                                     | 4237 | OD1  | ASP | 273   | A | <--                     | 8260 | O3   | SYL | 900   | 3.26     |
| Non-bonded contacts                                                    |      |      |     |       |   |                         |      |      |     |       |          |
| -----                                                                  |      |      |     |       |   |                         |      |      |     |       |          |
| <----- A T O M 1 ----->                                                |      |      |     |       |   | <----- A T O M 2 -----> |      |      |     |       |          |
| -----                                                                  |      |      |     |       |   |                         |      |      |     |       |          |
| Atom                                                                   | Atom | Res  | Res | Chain |   | Atom                    | Atom | Res  | Res | Chain | Distance |
| no.                                                                    | name | name | no. |       |   | no.                     | name | name | no. |       |          |
| 1.                                                                     | 1406 | CG   | ASP | 90    | A | ---                     | 8275 | O7   | SYL | 900   | 3.79     |
| 2.                                                                     | 1407 | OD1  | ASP | 90    | A | ---                     | 8275 | O7   | SYL | 900   | 3.38     |
| 3.                                                                     | 1408 | OD2  | ASP | 90    | A | ---                     | 8274 | C25  | SYL | 900   | 3.88     |
| 4.                                                                     | 1408 | OD2  | ASP | 90    | A | ---                     | 8275 | O7   | SYL | 900   | 3.75     |
| 5.                                                                     | 1416 | C    | VAL | 91    | A | ---                     | 8274 | C25  | SYL | 900   | 3.62     |
| 6.                                                                     | 1416 | C    | VAL | 91    | A | ---                     | 8275 | O7   | SYL | 900   | 3.73     |
| 7.                                                                     | 1417 | O    | VAL | 91    | A | ---                     | 8274 | C25  | SYL | 900   | 2.82     |
| 8.                                                                     | 1417 | O    | VAL | 91    | A | ---                     | 8275 | O7   | SYL | 900   | 2.78     |
| 9.                                                                     | 1431 | CA   | GLU | 92    | A | ---                     | 8274 | C25  | SYL | 900   | 3.79     |
| 10.                                                                    | 1445 | N    | GLY | 93    | A | ---                     | 8247 | C4   | SYL | 900   | 3.63     |
| 11.                                                                    | 1445 | N    | GLY | 93    | A | ---                     | 8248 | C5   | SYL | 900   | 3.27     |
| 12.                                                                    | 1445 | N    | GLY | 93    | A | ---                     | 8249 | C6   | SYL | 900   | 3.68     |
| 13.                                                                    | 1446 | CA   | GLY | 93    | A | ---                     | 8248 | C5   | SYL | 900   | 3.74     |
| 14.                                                                    | 1446 | CA   | GLY | 93    | A | ---                     | 8249 | C6   | SYL | 900   | 3.84     |
| 15.                                                                    | 1446 | CA   | GLY | 93    | A | ---                     | 8271 | O5   | SYL | 900   | 3.72     |
| 16.                                                                    | 1447 | C    | GLY | 93    | A | ---                     | 8248 | C5   | SYL | 900   | 3.63     |
| 17.                                                                    | 1447 | C    | GLY | 93    | A | ---                     | 8271 | O5   | SYL | 900   | 3.53     |
| 18.                                                                    | 1448 | O    | GLY | 93    | A | ---                     | 8248 | C5   | SYL | 900   | 3.19     |
| 19.                                                                    | 1448 | O    | GLY | 93    | A | ---                     | 8249 | C6   | SYL | 900   | 3.86     |
| 20.                                                                    | 1448 | O    | GLY | 93    | A | ---                     | 8271 | O5   | SYL | 900   | 3.73     |
| 21.                                                                    | 1452 | N    | CYS | 94    | A | ---                     | 8271 | O5   | SYL | 900   | 3.88     |
| 22.                                                                    | 1595 | CG   | ASN | 104   | A | ---                     | 8271 | O5   | SYL | 900   | 3.39     |
| 23.                                                                    | 1597 | OD1  | ASN | 104   | A | ---                     | 8271 | O5   | SYL | 900   | 3.20     |
| 24.                                                                    | 1596 | ND2  | ASN | 104   | A | ---                     | 8271 | O5   | SYL | 900   | 3.70     |
| 25.                                                                    | 1596 | ND2  | ASN | 104   | A | ---                     | 8272 | O6   | SYL | 900   | 3.46     |
| 26.                                                                    | 2141 | CG   | PRO | 141   | A | ---                     | 8248 | C5   | SYL | 900   | 3.23     |
| 27.                                                                    | 2141 | CG   | PRO | 141   | A | ---                     | 8249 | C6   | SYL | 900   | 3.83     |
| 28.                                                                    | 2141 | CG   | PRO | 141   | A | ---                     | 8271 | O5   | SYL | 900   | 3.87     |
| 29.                                                                    | 2207 | CE1  | PHE | 146   | A | ---                     | 8247 | C4   | SYL | 900   | 3.87     |
| 30.                                                                    | 2207 | CE1  | PHE | 146   | A | ---                     | 8255 | O2   | SYL | 900   | 3.68     |
| 31.                                                                    | 2904 | CD1  | TRP | 186   | A | ---                     | 8276 | O8   | SYL | 900   | 3.84     |
| 32.                                                                    | 2984 | OE2  | GLU | 191   | A | ---                     | 8275 | O7   | SYL | 900   | 3.01     |
| 33.                                                                    | 3933 | CB   | ASN | 252   | A | ---                     | 8267 | C20  | SYL | 900   | 3.53     |
| 34.                                                                    | 3933 | CB   | ASN | 252   | A | ---                     | 8268 | C21  | SYL | 900   | 3.57     |
| 35.                                                                    | 3933 | CB   | ASN | 252   | A | ---                     | 8277 | O9   | SYL | 900   | 3.75     |

|                                   |      |     |     |     |   |     |      |     |     |     |      |
|-----------------------------------|------|-----|-----|-----|---|-----|------|-----|-----|-----|------|
| 36.                               | 3935 | ND2 | ASN | 252 | A | --- | 8268 | C21 | SYL | 900 | 3.82 |
| 37.                               | 3935 | ND2 | ASN | 252 | A | --- | 8269 | C22 | SYL | 900 | 3.41 |
| 38.                               | 3935 | ND2 | ASN | 252 | A | --- | 8270 | C23 | SYL | 900 | 3.63 |
| 39.                               | 3935 | ND2 | ASN | 252 | A | --- | 8278 | O10 | SYL | 900 | 3.61 |
| 40.                               | 3947 | CB  | LEU | 253 | A | --- | 8260 | O3  | SYL | 900 | 3.70 |
| 41.                               | 3947 | CB  | LEU | 253 | A | --- | 8263 | C17 | SYL | 900 | 3.86 |
| 42.                               | 3947 | CB  | LEU | 253 | A | --- | 8276 | O8  | SYL | 900 | 3.28 |
| 43.                               | 3950 | CD2 | LEU | 253 | A | --- | 8260 | O3  | SYL | 900 | 3.83 |
| 44.                               | 3962 | N   | GLN | 254 | A | --- | 8260 | O3  | SYL | 900 | 3.65 |
| 45.                               | 4236 | CG  | ASP | 273 | A | --- | 8256 | C11 | SYL | 900 | 3.82 |
| 46.                               | 4236 | CG  | ASP | 273 | A | --- | 8261 | C15 | SYL | 900 | 3.74 |
| 47.                               | 4237 | OD1 | ASP | 273 | A | --- | 8260 | O3  | SYL | 900 | 3.26 |
| 48.                               | 4237 | OD1 | ASP | 273 | A | --- | 8261 | C15 | SYL | 900 | 3.31 |
| 49.                               | 4237 | OD1 | ASP | 273 | A | --- | 8262 | C16 | SYL | 900 | 3.75 |
| 50.                               | 4238 | OD2 | ASP | 273 | A | --- | 8252 | O1  | SYL | 900 | 3.79 |
| 51.                               | 4238 | OD2 | ASP | 273 | A | --- | 8253 | C9  | SYL | 900 | 3.73 |
| 52.                               | 4238 | OD2 | ASP | 273 | A | --- | 8256 | C11 | SYL | 900 | 2.97 |
| 53.                               | 4238 | OD2 | ASP | 273 | A | --- | 8257 | C12 | SYL | 900 | 3.74 |
| 54.                               | 4238 | OD2 | ASP | 273 | A | --- | 8261 | C15 | SYL | 900 | 3.85 |
| Number of hydrogen bonds: 3       |      |     |     |     |   |     |      |     |     |     |      |
| Number of non-bonded contacts: 54 |      |     |     |     |   |     |      |     |     |     |      |

#### Supplementary Table-4 List of protein-ligand interaction between Helicase and Luteolin

| PDB code: No PDB (Helicase) Ligand: Luteolin (LUT) |           |          |         |       |          |                         |          |         |       |          |      |
|----------------------------------------------------|-----------|----------|---------|-------|----------|-------------------------|----------|---------|-------|----------|------|
| Non-bonded contacts                                |           |          |         |       |          |                         |          |         |       |          |      |
| -----                                              |           |          |         |       |          |                         |          |         |       |          |      |
| <----- A T O M 1 ----->                            |           |          |         |       |          | <----- A T O M 2 -----> |          |         |       |          |      |
| Atom no.                                           | Atom name | Res name | Res no. | Chain | Atom no. | Atom name               | Res name | Res no. | Chain | Distance |      |
| 1.                                                 | 4407      | NZ       | LYS     | 288   | A        | ---                     | 9312     | C13     | LUT   | 900      | 3.45 |
| 2.                                                 | 4407      | NZ       | LYS     | 288   | A        | ---                     | 9313     | C14     | LUT   | 900      | 3.06 |
| 3.                                                 | 4407      | NZ       | LYS     | 288   | A        | ---                     | 9314     | C15     | LUT   | 900      | 3.52 |
| 4.                                                 | 4407      | NZ       | LYS     | 288   | A        | ---                     | 9315     | O5      | LUT   | 900      | 3.03 |
| 5.                                                 | 4407      | NZ       | LYS     | 288   | A        | ---                     | 9316     | O6      | LUT   | 900      | 3.80 |
| 6.                                                 | 4421      | N        | SER     | 289   | A        | ---                     | 9316     | O6      | LUT   | 900      | 3.83 |
| 7.                                                 | 4425      | CB       | SER     | 289   | A        | ---                     | 9315     | O5      | LUT   | 900      | 3.37 |
| 8.                                                 | 4425      | CB       | SER     | 289   | A        | ---                     | 9316     | O6      | LUT   | 900      | 3.35 |
| 9.                                                 | 4426      | OG       | SER     | 289   | A        | ---                     | 9315     | O5      | LUT   | 900      | 3.28 |
| 10.                                                | 4784      | CA       | ALA     | 313   | A        | ---                     | 9310     | C11     | LUT   | 900      | 3.66 |
| 11.                                                | 4787      | CB       | ALA     | 313   | A        | ---                     | 9310     | C11     | LUT   | 900      | 3.70 |
| 12.                                                | 4825      | CB       | ALA     | 316   | A        | ---                     | 9303     | C8      | LUT   | 900      | 3.34 |
| 13.                                                | 4825      | CB       | ALA     | 316   | A        | ---                     | 9304     | C9      | LUT   | 900      | 3.70 |
| 14.                                                | 4825      | CB       | ALA     | 316   | A        | ---                     | 9309     | C10     | LUT   | 900      | 3.70 |
| 15.                                                | 4825      | CB       | ALA     | 316   | A        | ---                     | 9314     | C15     | LUT   | 900      | 3.63 |
| 16.                                                | 5762      | CG       | ASP     | 374   | A        | ---                     | 9311     | C12     | LUT   | 900      | 3.90 |
| 17.                                                | 5762      | CG       | ASP     | 374   | A        | ---                     | 9316     | O6      | LUT   | 900      | 3.30 |

|                                   |      |     |     |     |   |     |      |     |     |     |      |
|-----------------------------------|------|-----|-----|-----|---|-----|------|-----|-----|-----|------|
| 18.                               | 5763 | OD1 | ASP | 374 | A | --- | 9316 | O6  | LUT | 900 | 3.36 |
| 19.                               | 5764 | OD2 | ASP | 374 | A | --- | 9311 | C12 | LUT | 900 | 3.72 |
| 20.                               | 5764 | OD2 | ASP | 374 | A | --- | 9312 | C13 | LUT | 900 | 3.52 |
| 21.                               | 5764 | OD2 | ASP | 374 | A | --- | 9316 | O6  | LUT | 900 | 2.66 |
| 22.                               | 5774 | CG  | GLU | 375 | A | --- | 9311 | C12 | LUT | 900 | 3.82 |
| 23.                               | 5775 | CD  | GLU | 375 | A | --- | 9310 | C11 | LUT | 900 | 3.69 |
| 24.                               | 5777 | OE2 | GLU | 375 | A | --- | 9301 | C6  | LUT | 900 | 3.78 |
| 25.                               | 5777 | OE2 | GLU | 375 | A | --- | 9305 | O1  | LUT | 900 | 3.23 |
| 26.                               | 5777 | OE2 | GLU | 375 | A | --- | 9310 | C11 | LUT | 900 | 3.16 |
| 27.                               | 5777 | OE2 | GLU | 375 | A | --- | 9311 | C12 | LUT | 900 | 3.86 |
| 28.                               | 8299 | O   | ASP | 534 | A | --- | 9306 | O2  | LUT | 900 | 3.70 |
| 29.                               | 8333 | O   | GLN | 537 | A | --- | 9296 | C1  | LUT | 900 | 3.85 |
| 30.                               | 8333 | O   | GLN | 537 | A | --- | 9297 | C2  | LUT | 900 | 3.89 |
| 31.                               | 8333 | O   | GLN | 537 | A | --- | 9298 | C3  | LUT | 900 | 3.66 |
| 32.                               | 8333 | O   | GLN | 537 | A | --- | 9299 | C4  | LUT | 900 | 3.37 |
| 33.                               | 8333 | O   | GLN | 537 | A | --- | 9300 | C5  | LUT | 900 | 3.34 |
| 34.                               | 8333 | O   | GLN | 537 | A | --- | 9301 | C6  | LUT | 900 | 3.58 |
| 35.                               | 8333 | O   | GLN | 537 | A | --- | 9305 | O1  | LUT | 900 | 3.88 |
| 36.                               | 8336 | CD  | GLN | 537 | A | --- | 9301 | C6  | LUT | 900 | 3.75 |
| 37.                               | 8336 | CD  | GLN | 537 | A | --- | 9306 | O2  | LUT | 900 | 3.74 |
| 38.                               | 8338 | OE1 | GLN | 537 | A | --- | 9296 | C1  | LUT | 900 | 3.31 |
| 39.                               | 8338 | OE1 | GLN | 537 | A | --- | 9301 | C6  | LUT | 900 | 3.33 |
| 40.                               | 8338 | OE1 | GLN | 537 | A | --- | 9306 | O2  | LUT | 900 | 2.69 |
| Number of non-bonded contacts: 40 |      |     |     |     |   |     |      |     |     |     |      |

**Supplementary Table-5 List of protein-ligand interaction between Methyl transferase and Amikacin hydrate**

| List of protein-ligand interactions |      |      |          |       |     |                                       |      |      |     |       |          |
|-------------------------------------|------|------|----------|-------|-----|---------------------------------------|------|------|-----|-------|----------|
| PDB code: <b>6W61</b>               |      |      |          |       |     | Ligand: <b>Amikacin hydrate (AMK)</b> |      |      |     |       |          |
| Hydrogen bonds                      |      |      |          |       |     |                                       |      |      |     |       |          |
| -----                               |      |      |          |       |     |                                       |      |      |     |       |          |
| <----- A T O M 1 ----->             |      |      |          |       |     | <----- A T O M 2 ----->               |      |      |     |       |          |
| Atom                                | Atom | Res  | Res      | Chain |     | Atom                                  | Atom | Res  | Res | Chain | Distance |
| no.                                 | name | name | no.      |       |     | no.                                   | name | name | no. |       |          |
| 1.                                  | 1637 | OD1  | ASP 6900 | A     | <-- | 6684                                  | N4   | AMK  | 900 |       | 2.63     |
| 2.                                  | 5877 | O    | ILE 4334 | B     | <-- | 6695                                  | O12  | AMK  | 900 |       | 2.74     |
| 3.                                  | 5967 | O    | LYS 4340 | B     | <-- | 6663                                  | O2   | AMK  | 900 |       | 2.98     |
| 4.                                  | 5967 | O    | LYS 4340 | B     | <-- | 6665                                  | O3   | AMK  | 900 |       | 2.92     |
| 5.                                  | 5989 | O    | GLY 4341 | B     | <-- | 6676                                  | N2   | AMK  | 900 |       | 3.30     |
| Non-bonded contacts                 |      |      |          |       |     |                                       |      |      |     |       |          |
| -----                               |      |      |          |       |     |                                       |      |      |     |       |          |
| <----- A T O M 1 ----->             |      |      |          |       |     | <----- A T O M 2 ----->               |      |      |     |       |          |
| Atom                                | Atom | Res  | Res      | Chain |     | Atom                                  | Atom | Res  | Res | Chain | Distance |
| no.                                 | name | name | no.      |       |     | no.                                   | name | name | no. |       |          |
| 1.                                  | 1636 | CG   | ASP 6900 | A     | --- | 6684                                  | N4   | AMK  | 900 |       | 3.21     |
| 2.                                  | 1637 | OD1  | ASP 6900 | A     | --- | 6683                                  | C16  | AMK  | 900 |       | 3.82     |
| 3.                                  | 1637 | OD1  | ASP 6900 | A     | --- | 6684                                  | N4   | AMK  | 900 |       | 2.63     |
| 4.                                  | 1638 | OD2  | ASP 6900 | A     | --- | 6684                                  | N4   | AMK  | 900 |       | 3.22     |
| 5.                                  | 1673 | CG1  | VAL 6902 | A     | --- | 6683                                  | C16  | AMK  | 900 |       | 3.85     |
| 6.                                  | 5793 | O    | TYR 4329 | B     | --- | 6685                                  | O9   | AMK  | 900 |       | 3.60     |
| 7.                                  | 5812 | CA   | CYS 4330 | B     | --- | 6685                                  | O9   | AMK  | 900 |       | 3.75     |
| 8.                                  | 5814 | O    | CYS 4330 | B     | --- | 6680                                  | C14  | AMK  | 900 |       | 3.38     |
| 9.                                  | 5814 | O    | CYS 4330 | B     | --- | 6685                                  | O9   | AMK  | 900 |       | 3.45     |
| 10.                                 | 5858 | CA   | HIS 4333 | B     | --- | 6685                                  | O9   | AMK  | 900 |       | 3.61     |
| 11.                                 | 5860 | O    | HIS 4333 | B     | --- | 6694                                  | O11  | AMK  | 900 |       | 3.55     |
| 12.                                 | 5863 | ND1  | HIS 4333 | B     | --- | 6682                                  | C15  | AMK  | 900 |       | 3.59     |
| 13.                                 | 5863 | ND1  | HIS 4333 | B     | --- | 6683                                  | C16  | AMK  | 900 |       | 3.64     |
| 14.                                 | 5876 | C    | ILE 4334 | B     | --- | 6686                                  | C17  | AMK  | 900 |       | 3.79     |
| 15.                                 | 5876 | C    | ILE 4334 | B     | --- | 6695                                  | O12  | AMK  | 900 |       | 3.48     |
| 16.                                 | 5877 | O    | ILE 4334 | B     | --- | 6686                                  | C17  | AMK  | 900 |       | 3.84     |
| 17.                                 | 5877 | O    | ILE 4334 | B     | --- | 6687                                  | C18  | AMK  | 900 |       | 3.68     |
| 18.                                 | 5877 | O    | ILE 4334 | B     | --- | 6695                                  | O12  | AMK  | 900 |       | 2.74     |
| 19.                                 | 5898 | CG   | ASP 4335 | B     | --- | 6693                                  | N5   | AMK  | 900 |       | 3.78     |
| 20.                                 | 5899 | OD1  | ASP 4335 | B     | --- | 6686                                  | C17  | AMK  | 900 |       | 3.29     |
| 21.                                 | 5899 | OD1  | ASP 4335 | B     | --- | 6687                                  | C18  | AMK  | 900 |       | 3.70     |
| 22.                                 | 5899 | OD1  | ASP 4335 | B     | --- | 6693                                  | N5   | AMK  | 900 |       | 2.61     |
| 23.                                 | 5911 | ND1  | HIS 4336 | B     | --- | 6676                                  | N2   | AMK  | 900 |       | 3.89     |
| 24.                                 | 5913 | CE1  | HIS 4336 | B     | --- | 6671                                  | C9   | AMK  | 900 |       | 3.36     |
| 25.                                 | 5913 | CE1  | HIS 4336 | B     | --- | 6676                                  | N2   | AMK  | 900 |       | 3.64     |
| 26.                                 | 5966 | C    | LYS 4340 | B     | --- | 6663                                  | O2   | AMK  | 900 |       | 3.78     |
| 27.                                 | 5967 | O    | LYS 4340 | B     | --- | 6657                                  | C1   | AMK  | 900 |       | 3.76     |
| 28.                                 | 5967 | O    | LYS 4340 | B     | --- | 6662                                  | C5   | AMK  | 900 |       | 3.37     |
| 29.                                 | 5967 | O    | LYS 4340 | B     | --- | 6663                                  | O2   | AMK  | 900 |       | 2.98     |
| 30.                                 | 5967 | O    | LYS 4340 | B     | --- | 6665                                  | O3   | AMK  | 900 |       | 2.92     |
| 31.                                 | 5989 | O    | GLY 4341 | B     | --- | 6662                                  | C5   | AMK  | 900 |       | 3.76     |
| 32.                                 | 5989 | O    | GLY 4341 | B     | --- | 6676                                  | N2   | AMK  | 900 |       | 3.30     |



|                                   |      |    |          |   |     |      |    |     |     |      |
|-----------------------------------|------|----|----------|---|-----|------|----|-----|-----|------|
| 33.                               | 5993 | N  | PHE 4342 | B | --- | 6663 | O2 | AMK | 900 | 3.60 |
| 34.                               | 5994 | CA | PHE 4342 | B | --- | 6663 | O2 | AMK | 900 | 3.55 |
| 35.                               | 5997 | CB | PHE 4342 | B | --- | 6663 | O2 | AMK | 900 | 3.74 |
| 36.                               | 6013 | N  | CYS 4343 | B | --- | 6676 | N2 | AMK | 900 | 3.43 |
| 37.                               | 6017 | CB | CYS 4343 | B | --- | 6676 | N2 | AMK | 900 | 3.32 |
| Number of hydrogen bonds: 5       |      |    |          |   |     |      |    |     |     |      |
| Number of non-bonded contacts: 37 |      |    |          |   |     |      |    |     |     |      |

### Supplementary Table-6 List of protein-ligand interaction between Methyl transferase and Geneticin

| PDB code: 6W61                                           |      |     |          |   |     |      |     |     |     |      | Ligand: Geneticin (GEN) |  |  |  |  |  |  |  |  |  |  |
|----------------------------------------------------------|------|-----|----------|---|-----|------|-----|-----|-----|------|-------------------------|--|--|--|--|--|--|--|--|--|--|
| Hydrogen bonds                                           |      |     |          |   |     |      |     |     |     |      |                         |  |  |  |  |  |  |  |  |  |  |
| -----                                                    |      |     |          |   |     |      |     |     |     |      |                         |  |  |  |  |  |  |  |  |  |  |
| <----- A T O M 1 ----->                                  |      |     |          |   |     |      |     |     |     |      | <----- A T O M 2 -----> |  |  |  |  |  |  |  |  |  |  |
| Atom Atom Res Res Atom Atom Res Res                      |      |     |          |   |     |      |     |     |     |      |                         |  |  |  |  |  |  |  |  |  |  |
| no. name name no. Chain no. name name no. Chain Distance |      |     |          |   |     |      |     |     |     |      |                         |  |  |  |  |  |  |  |  |  |  |
| 1.                                                       | 1637 | OD1 | ASP 6900 | A | <-- | 6687 | O8  | GEN | 900 | 2.66 |                         |  |  |  |  |  |  |  |  |  |  |
| 2.                                                       | 1646 | O   | PHE 6901 | A | <-- | 6688 | O9  | GEN | 900 | 2.89 |                         |  |  |  |  |  |  |  |  |  |  |
| 3.                                                       | 5860 | O   | HIS 4333 | B | <-- | 6671 | N2  | GEN | 900 | 3.08 |                         |  |  |  |  |  |  |  |  |  |  |
| 4.                                                       | 5899 | OD1 | ASP 4335 | B | <-- | 6665 | N1  | GEN | 900 | 2.74 |                         |  |  |  |  |  |  |  |  |  |  |
| Non-bonded contacts                                      |      |     |          |   |     |      |     |     |     |      |                         |  |  |  |  |  |  |  |  |  |  |
| -----                                                    |      |     |          |   |     |      |     |     |     |      |                         |  |  |  |  |  |  |  |  |  |  |
| <----- A T O M 1 ----->                                  |      |     |          |   |     |      |     |     |     |      | <----- A T O M 2 -----> |  |  |  |  |  |  |  |  |  |  |
| Atom Atom Res Res Atom Atom Res Res                      |      |     |          |   |     |      |     |     |     |      |                         |  |  |  |  |  |  |  |  |  |  |
| no. name name no. Chain no. name name no. Chain Distance |      |     |          |   |     |      |     |     |     |      |                         |  |  |  |  |  |  |  |  |  |  |
| 1.                                                       | 1636 | CG  | ASP 6900 | A | --- | 6676 | C12 | GEN | 900 | 3.59 |                         |  |  |  |  |  |  |  |  |  |  |
| 2.                                                       | 1636 | CG  | ASP 6900 | A | --- | 6681 | N4  | GEN | 900 | 3.54 |                         |  |  |  |  |  |  |  |  |  |  |
| 3.                                                       | 1636 | CG  | ASP 6900 | A | --- | 6687 | O8  | GEN | 900 | 3.18 |                         |  |  |  |  |  |  |  |  |  |  |
| 4.                                                       | 1637 | OD1 | ASP 6900 | A | --- | 6676 | C12 | GEN | 900 | 3.38 |                         |  |  |  |  |  |  |  |  |  |  |
| 5.                                                       | 1637 | OD1 | ASP 6900 | A | --- | 6680 | C15 | GEN | 900 | 3.34 |                         |  |  |  |  |  |  |  |  |  |  |
| 6.                                                       | 1637 | OD1 | ASP 6900 | A | --- | 6681 | N4  | GEN | 900 | 3.80 |                         |  |  |  |  |  |  |  |  |  |  |
| 7.                                                       | 1637 | OD1 | ASP 6900 | A | --- | 6685 | C18 | GEN | 900 | 3.54 |                         |  |  |  |  |  |  |  |  |  |  |
| 8.                                                       | 1637 | OD1 | ASP 6900 | A | --- | 6687 | O8  | GEN | 900 | 2.66 |                         |  |  |  |  |  |  |  |  |  |  |
| 9.                                                       | 1638 | OD2 | ASP 6900 | A | --- | 6676 | C12 | GEN | 900 | 3.16 |                         |  |  |  |  |  |  |  |  |  |  |

|                                   |      |     |     |      |   |     |      |     |     |     |      |
|-----------------------------------|------|-----|-----|------|---|-----|------|-----|-----|-----|------|
| 10.                               | 1638 | OD2 | ASP | 6900 | A | --- | 6681 | N4  | GEN | 900 | 2.86 |
| 11.                               | 1638 | OD2 | ASP | 6900 | A | --- | 6687 | O8  | GEN | 900 | 3.54 |
| 12.                               | 1643 | N   | PHE | 6901 | A | --- | 6687 | O8  | GEN | 900 | 3.66 |
| 13.                               | 1645 | C   | PHE | 6901 | A | --- | 6687 | O8  | GEN | 900 | 3.57 |
| 14.                               | 1645 | C   | PHE | 6901 | A | --- | 6688 | O9  | GEN | 900 | 3.54 |
| 15.                               | 1646 | O   | PHE | 6901 | A | --- | 6685 | C18 | GEN | 900 | 3.63 |
| 16.                               | 1646 | O   | PHE | 6901 | A | --- | 6687 | O8  | GEN | 900 | 3.49 |
| 17.                               | 1646 | O   | PHE | 6901 | A | --- | 6688 | O9  | GEN | 900 | 2.89 |
| 18.                               | 1663 | N   | VAL | 6902 | A | --- | 6688 | O9  | GEN | 900 | 3.74 |
| 19.                               | 1665 | CA  | VAL | 6902 | A | --- | 6688 | O9  | GEN | 900 | 3.48 |
| 20.                               | 1673 | CG1 | VAL | 6902 | A | --- | 6688 | O9  | GEN | 900 | 3.48 |
| 21.                               | 5793 | O   | TYR | 4329 | B | --- | 6662 | O2  | GEN | 900 | 3.90 |
| 22.                               | 5858 | CA  | HIS | 4333 | B | --- | 6661 | C4  | GEN | 900 | 3.80 |
| 23.                               | 5858 | CA  | HIS | 4333 | B | --- | 6666 | O3  | GEN | 900 | 3.62 |
| 24.                               | 5859 | C   | HIS | 4333 | B | --- | 6661 | C4  | GEN | 900 | 3.58 |
| 25.                               | 5859 | C   | HIS | 4333 | B | --- | 6671 | N2  | GEN | 900 | 3.77 |
| 26.                               | 5860 | O   | HIS | 4333 | B | --- | 6661 | C4  | GEN | 900 | 3.74 |
| 27.                               | 5860 | O   | HIS | 4333 | B | --- | 6667 | C7  | GEN | 900 | 3.86 |
| 28.                               | 5860 | O   | HIS | 4333 | B | --- | 6671 | N2  | GEN | 900 | 3.08 |
| 29.                               | 5861 | CB  | HIS | 4333 | B | --- | 6666 | O3  | GEN | 900 | 3.58 |
| 30.                               | 5861 | CB  | HIS | 4333 | B | --- | 6681 | N4  | GEN | 900 | 3.55 |
| 31.                               | 5862 | CG  | HIS | 4333 | B | --- | 6681 | N4  | GEN | 900 | 3.32 |
| 32.                               | 5863 | ND1 | HIS | 4333 | B | --- | 6676 | C12 | GEN | 900 | 3.79 |
| 33.                               | 5863 | ND1 | HIS | 4333 | B | --- | 6680 | C15 | GEN | 900 | 3.31 |
| 34.                               | 5863 | ND1 | HIS | 4333 | B | --- | 6681 | N4  | GEN | 900 | 3.23 |
| 35.                               | 5863 | ND1 | HIS | 4333 | B | --- | 6687 | O8  | GEN | 900 | 3.28 |
| 36.                               | 5865 | CE1 | HIS | 4333 | B | --- | 6680 | C15 | GEN | 900 | 3.81 |
| 37.                               | 5865 | CE1 | HIS | 4333 | B | --- | 6681 | N4  | GEN | 900 | 3.84 |
| 38.                               | 5865 | CE1 | HIS | 4333 | B | --- | 6687 | O8  | GEN | 900 | 3.26 |
| 39.                               | 5877 | O   | ILE | 4334 | B | --- | 6657 | C1  | GEN | 900 | 3.69 |
| 40.                               | 5877 | O   | ILE | 4334 | B | --- | 6662 | O2  | GEN | 900 | 3.71 |
| 41.                               | 5899 | OD1 | ASP | 4335 | B | --- | 6660 | C3  | GEN | 900 | 3.73 |
| 42.                               | 5899 | OD1 | ASP | 4335 | B | --- | 6664 | C6  | GEN | 900 | 3.76 |
| 43.                               | 5899 | OD1 | ASP | 4335 | B | --- | 6665 | N1  | GEN | 900 | 2.74 |
| 44.                               | 5911 | ND1 | HIS | 4336 | B | --- | 6682 | C16 | GEN | 900 | 3.75 |
| 45.                               | 5913 | CE1 | HIS | 4336 | B | --- | 6674 | C11 | GEN | 900 | 3.89 |
| 46.                               | 5913 | CE1 | HIS | 4336 | B | --- | 6682 | C16 | GEN | 900 | 3.51 |
| 47.                               | 5967 | O   | LYS | 4340 | B | --- | 6684 | C17 | GEN | 900 | 3.31 |
| 48.                               | 5987 | CA  | GLY | 4341 | B | --- | 6684 | C17 | GEN | 900 | 3.89 |
| 49.                               | 5988 | C   | GLY | 4341 | B | --- | 6678 | N3  | GEN | 900 | 3.87 |
| 50.                               | 5988 | C   | GLY | 4341 | B | --- | 6684 | C17 | GEN | 900 | 3.68 |
| 51.                               | 5989 | O   | GLY | 4341 | B | --- | 6672 | C10 | GEN | 900 | 3.29 |
| 52.                               | 5989 | O   | GLY | 4341 | B | --- | 6677 | C13 | GEN | 900 | 3.88 |
| 53.                               | 5989 | O   | GLY | 4341 | B | --- | 6678 | N3  | GEN | 900 | 3.06 |
| 54.                               | 5989 | O   | GLY | 4341 | B | --- | 6682 | C16 | GEN | 900 | 3.26 |
| 55.                               | 5989 | O   | GLY | 4341 | B | --- | 6684 | C17 | GEN | 900 | 3.25 |
| 56.                               | 6013 | N   | CYS | 4343 | B | --- | 6682 | C16 | GEN | 900 | 3.72 |
| 57.                               | 6017 | CB  | CYS | 4343 | B | --- | 6682 | C16 | GEN | 900 | 3.60 |
| Number of hydrogen bonds: 4       |      |     |     |      |   |     |      |     |     |     |      |
| Number of non-bonded contacts: 57 |      |     |     |      |   |     |      |     |     |     |      |

**Supplementary Table-7.** The various components of the Binding Free Energy (kcal mol<sup>-1</sup>) evaluated by Molecular Mechanics/Generalized Borne Surface Area (MM/GBSA) method for Rutin-RDRP complex during the simulation.

|              | Complex    |               | Receptor   |               | Ligand  |               | Delta         |               |
|--------------|------------|---------------|------------|---------------|---------|---------------|---------------|---------------|
|              | Average    | Std. Dev. (±) | Average    | Std. Dev. (±) | Average | Std. Dev. (±) | Average       | Std. Dev. (±) |
| <b>VDW</b>   | -9483.16   | 46.17         | -9434.92   | 46.33         | -8.55   | 1.69          | -39.69        | 4.48          |
| <b>ELE</b>   | -81612.70  | 140.16        | -81362.80  | 139.02        | -98.01  | 6.70          | -151.88       | 8.48          |
| <b>GB</b>    | -11797.20  | 91.27         | -11876.70  | 92.40         | -79.61  | 4.31          | 159.14        | 7.99          |
| <b>GBSUR</b> | 373.51     | 2.89          | 375.88     | 2.81          | 5.04    | 0.03          | -7.40         | 0.25          |
| <b>GAS</b>   | -91095.80  | 134.67        | -90797.70  | 133.48        | -106.55 | 6.97          | -191.58       | 7.45          |
| <b>GBSOL</b> | -11423.70  | 90.71         | -11500.80  | 91.87         | -74.58  | 4.31          | 151.73        | 7.99          |
| <b>GBTOT</b> | -102520.00 | 88.20         | -102299.00 | 86.07         | -181.13 | 4.34          | <b>-39.84</b> | 3.78          |

**Supplementary Table-8.** The various components of the Binding Free Energy (kcal mol<sup>-1</sup>) evaluated by Molecular Mechanics/Generalized Borne Surface Area (MM/GBSA) method for Silymarin-Exoribonuclease complex during the simulation.

|              | Complex   |               | Receptor  |               | Ligand  |               | Delta         |               |
|--------------|-----------|---------------|-----------|---------------|---------|---------------|---------------|---------------|
|              | Average   | Std. Dev. (±) | Average   | Std. Dev. (±) | Average | Std. Dev. (±) | Average       | Std. Dev. (±) |
| <b>VDW</b>   | -4139.28  | 23.67         | -4106.96  | 23.32         | -4.15   | 1.45          | -28.17        | 2.25          |
| <b>ELE</b>   | -36626.90 | 72.19         | -36656.80 | 71.84         | 62.45   | 2.70          | -32.58        | 3.72          |
| <b>GB</b>    | -5468.06  | 49.27         | -5471.71  | 49.20         | -48.01  | 1.38          | 51.65         | 3.02          |
| <b>GBSUR</b> | 189.61    | 1.35          | 189.56    | 1.33          | 4.18    | 0.03          | -4.13         | 0.24          |
| <b>GAS</b>   | -4991.27  | 84.56         | -4914.58  | 84.46         | -15.94  | 5.67          | -60.75        | 3.81          |
| <b>GBSOL</b> | -5278.45  | 49.03         | -5282.15  | 48.94         | -43.82  | 1.38          | 47.52         | 3.02          |
| <b>GBTOT</b> | -10269.70 | 73.97         | -10196.70 | 73.50         | -59.76  | 5.51          | <b>-13.23</b> | 2.21          |

**Supplementary Table-9.** The various components of the Binding Free Energy (kcal mol<sup>-1</sup>) evaluated by Molecular Mechanics/Generalized Borne Surface Area (MM/GBSA) method for Luteolin-Helicase complex during simulation.

|              | Complex   |               | Receptor  |               | Ligand  |               | Delta   |               |
|--------------|-----------|---------------|-----------|---------------|---------|---------------|---------|---------------|
|              | Average   | Std. Dev. (±) | Average   | Std. Dev. (±) | Average | Std. Dev. (±) | Average | Std. Dev. (±) |
| <b>VDW</b>   | -4517.20  | 31.98         | -4487.37  | 31.47         | 0.13    | 1.44          | -29.96  | 2.99          |
| <b>ELE</b>   | -39784.10 | 78.42         | -39851.60 | 74.94         | 116.33  | 4.68          | -48.87  | 5.48          |
| <b>GB</b>    | -6345.41  | 53.98         | -6363.19  | 51.78         | -35.29  | 2.32          | 53.07   | 4.78          |
| <b>GBSUR</b> | 212.37    | 1.79          | 214.14    | 1.80          | 2.73    | 0.01          | -4.50   | 0.10          |
| <b>GAS</b>   | -44301.30 | 77.46         | -44339.00 | 74.56         | 116.46  | 4.54          | -78.83  | 5.35          |

|              |           |       |           |       |        |      |               |      |
|--------------|-----------|-------|-----------|-------|--------|------|---------------|------|
| <b>GBSOL</b> | -6133.04  | 53.65 | -6149.06  | 51.45 | -32.56 | 2.32 | 48.58         | 4.71 |
| <b>GBTOT</b> | -50434.40 | 57.23 | -50488.00 | 57.00 | 83.90  | 3.26 | <b>-30.26</b> | 2.15 |

**Supplementary Table-10.** The various components of the Binding Free Energy (kcal mol<sup>-1</sup>) evaluated by Molecular Mechanics/Generalized Borne Surface Area (MM/GBSA) method for Amikacin hydrate-methyltransferase complex during simulation.

|              | Complex   |               | Receptor  |               | Ligand  |               | Delta         |               |
|--------------|-----------|---------------|-----------|---------------|---------|---------------|---------------|---------------|
|              | Average   | Std. Dev. (±) | Average   | Std. Dev. (±) | Average | Std. Dev. (±) | Average       | Std. Dev. (±) |
| <b>VDW</b>   | -3210.18  | 19.60         | -3172.04  | 18.80         | -14.87  | 1.62          | -23.28        | 3.58          |
| <b>ELE</b>   | -30120.00 | 73.37         | -29663.10 | 62.87         | -80.67  | 9.29          | -376.26       | 36.51         |
| <b>GB</b>    | -4338.66  | 51.47         | -4203.92  | 40.61         | -520.33 | 4.78          | 385.60        | 34.39         |
| <b>GBSUR</b> | 144.55    | 1.11          | 143.98    | 1.12          | 5.31    | 0.07          | -4.74         | 0.20          |
| <b>GAS</b>   | -33330.20 | 71.93         | -32835.10 | 62.94         | -95.54  | 9.82          | -399.53       | 35.19         |
| <b>GBSOL</b> | -4194.11  | 51.13         | -4059.95  | 40.42         | -515.03 | 4.78          | 380.86        | 34.28         |
| <b>GBTOT</b> | -37524.30 | 44.69         | -36895.00 | 44.22         | -610.57 | 7.62          | <b>-18.67</b> | 4.73          |

**Supplementary Table-11.** The various components of the Binding Free Energy (kcal mol<sup>-1</sup>) evaluated by Molecular Mechanics/Generalized Borne Surface Area (MM/GBSA) method for Geneticin-methyltransferase complex during simulation.

|              | Complex   |               | Receptor  |               | Ligand  |               | Delta         |               |
|--------------|-----------|---------------|-----------|---------------|---------|---------------|---------------|---------------|
|              | Average   | Std. Dev. (±) | Average   | Std. Dev. (±) | Average | Std. Dev. (±) | Average       | Std. Dev. (±) |
| <b>VDW</b>   | -3237.24  | 20.19         | -3198.67  | 20.06         | -10.02  | 1.91          | -28.55        | 3.53          |
| <b>ELE</b>   | -30222.50 | 55.56         | -29785.90 | 53.82         | 32.18   | 8.41          | -468.75       | 15.89         |
| <b>GB</b>    | -4295.45  | 43.22         | -4219.32  | 41.35         | -545.66 | 4.67          | 469.53        | 14.12         |
| <b>GBSUR</b> | 142.06    | 1.31          | 142.55    | 1.34          | 4.45    | 0.04          | -4.94         | 0.14          |
| <b>GAS</b>   | -33459.70 | 54.67         | -32984.60 | 54.90         | 22.16   | 7.75          | -497.30       | 14.81         |
| <b>GBSOL</b> | -4153.40  | 42.93         | -4076.77  | 40.98         | -541.21 | 4.66          | 464.59        | 14.09         |
| <b>GBTOT</b> | -37613.10 | 33.71         | -37061.40 | 34.58         | -519.05 | 4.88          | <b>-32.71</b> | 3.55          |

Electrostatic energy (**ELE**); van der Waals contribution (**VDW**); total gas phase energy (**GAS**); nonpolar contribution to the solvation free energy (**GBSUR**); the electrostatic contribution to the solvation free energy (**GB**); sum of nonpolar and polar contributions to solvation (**GBSOL**); final estimated binding free energy (**GBTOT**).

**Supplementary Table-12.** Toxicity profile of 20 selected compounds.

| Name of the compound      | AMES Toxicity | hERG 1 Inhibitor | hERG 2 Inhibitor |
|---------------------------|---------------|------------------|------------------|
| <b>Rutin Hydrate</b>      | NO            | NO               | YES              |
| <b>Silymarin</b>          | NO            | NO               | YES              |
| <b>Quercetin</b>          | NO            | NO               | NO               |
| <b>Mitoxantrone 2HCL</b>  | NO            | NO               | YES              |
| <b>Luteolin</b>           | NO            | NO               | NO               |
| <b>Aloin</b>              | NO            | NO               | NO               |
| <b>Morin Hydrate</b>      | NO            | NO               | NO               |
| <b>Kaempferol</b>         | NO            | NO               | NO               |
| <b>Madecassoside</b>      | NO            | NO               | YES              |
| <b>Amikacin Hydrate</b>   | NO            | NO               | NO               |
| <b>Geneticin</b>          | NO            | NO               | NO               |
| <b>Netilmicin Sulfate</b> | NO            | NO               | NO               |
| <b>Hygromycin B</b>       | NO            | NO               | NO               |
| <b>Acarbose</b>           | NO            | NO               | YES              |
| <b>Apigenin</b>           | NO            | NO               | NO               |
| <b>Hesperidin</b>         | NO            | NO               | YES              |
| <b>Neohesperidin</b>      | NO            | NO               | YES              |
| <b>Troloxerutin</b>       | NO            | NO               | YES              |
| <b>Notoginsenoside R1</b> | NO            | NO               | YES              |
| <b>Salvianolic acid B</b> | NO            | NO               | NO               |

## References

- [1] Z. Jin, X. Du, Y. Xu, Y. Deng, M. Liu, Y. Zhao, B. Zhang, X. Li, L. Zhang, C. Peng, Y. Duan, J. Yu, L. Wang, K. Yang, F. Liu, R. Jiang, X. Yang, T. You, X. Liu, X. Yang, F. Bai, H. Liu, X. Liu, L.W. Guddat, W. Xu, G. Xiao, C. Qin, Z. Shi, H. Jiang, Z. Rao, H. Yang, Structure of M<sup>pro</sup> from COVID-19 virus and discovery of its inhibitors, bioRxiv, (2020) 2020.2002.2026.964882.
- [2] A.A.J.J.o.B.S. Elfiky, Dynamics, SARS-CoV-2 RNA dependent RNA polymerase (RdRp) targeting: An in silico perspective, (2020) 1-9.

- [3] B. Naik, N. Gupta, R. Ojha, S. Singh, V.K. Prajapati, D. Prusty, High throughput virtual screening reveals SARS-CoV-2 multi-target binding natural compounds to lead instant therapy for COVID-19 treatment, *International journal of biological macromolecules*, 160 (2020) 1-17.
- [4] J.A. Tanner, B.-J. Zheng, J. Zhou, R.M. Watt, J.-Q. Jiang, K.-L. Wong, Y.-P. Lin, L.-Y. Lu, M.-L. He, H.-F.J.C. Kung, *biology*, The adamantane-derived bananins are potent inhibitors of the helicase activities and replication of SARS coronavirus, 12 (2005) 303-311.
- [5] M.U. Mirza, M. Froeyen, Structural elucidation of SARS-CoV-2 vital proteins: Computational methods reveal potential drug candidates against main protease, Nsp12 polymerase and Nsp13 helicase, *Journal of Pharmaceutical Analysis*, 10 (2020) 320-328.
- [6] Y. Ma, L. Wu, N. Shaw, Y. Gao, J. Wang, Y. Sun, Z. Lou, L. Yan, R. Zhang, Z. Rao, Structural basis and functional analysis of the SARS coronavirus nsp14–nsp10 complex, *Proceedings of the National Academy of Sciences*, 112 (2015) 9436.
- [7] A. Chandra, V. Gurjar, I. Qamar, N. Singh, Identification of potential inhibitors of SARS-COV-2 endoribonuclease (EndoU) from FDA approved drugs: a drug repurposing approach to find therapeutics for COVID-19, *Journal of Biomolecular Structure and Dynamics*, (2020) 1-11.
- [8] Y. Kim, R. Jedrzejczak, N.I. Maltseva, M. Wilamowski, M. Endres, A. Godzik, K. Michalska, A. Joachimiak, Crystal structure of Nsp15 endoribonuclease NendoU from SARS-CoV-2, 29 (2020) 1596-1605.
- [9] K. Sharma, S. Morla, A. Goyal, S. Kumar, Computational guided drug repurposing for targeting 2'-O-ribose methyltransferase of SARS-CoV-2, *Life Sci*, 259 (2020) 118169-118169.
- [10] A.C. Walls, Y.J. Park, M.A. Tortorici, A. Wall, A.T. McGuire, D. Velesler, Structure, Function, and Antigenicity of the SARS-CoV-2 Spike Glycoprotein, *Cell*, 181 (2020) 281-292.e286.
- [11] Q. Wang, Y. Zhang, L. Wu, S. Niu, C. Song, Z. Zhang, G. Lu, C. Qiao, Y. Hu, K.Y. Yuen, Q. Wang, H. Zhou, J. Yan, J. Qi, Structural and Functional Basis of SARS-CoV-2 Entry by Using Human ACE2, *Cell*, 181 (2020) 894-904.e899.
- [12] M.U. Mirza, S. Ahmad, I. Abdullah, M. Froeyen, Identification of novel human USP2 inhibitor: might involve in SARS-CoV-2 papain-like (PLpro) protease deubiquitination activity, (2020).
- [13] S. Kang, M. Yang, Z. Hong, L. Zhang, Z. Huang, X. Chen, S. He, Z. Zhou, Z. Zhou, Q. Chen, Y. Yan, C. Zhang, H. Shan, S. Chen, Crystal structure of SARS-CoV-2 nucleocapsid protein RNA

binding domain reveals potential unique drug targeting sites, *Acta pharmaceutica Sinica. B*, 10 (2020) 1228-1238.
